# Supplementary material for: Prognostic Significance of Dynamic Changes in Glomerular C3 Deposition in Membranous Nephropathy
Source: Research Square preprint supplement (doi:10.21203/rs.3.rs-6434093/v1), 2025-05-09
Supplement: Supplementary file 1 [file d0f482e32f09f3180a93da2f.docx]

Supplementary Table 1. Case Summary of MN Patients Following MPD Therapy

| **Patient ID** | **Pathologic Diagnosis  (Initial/Repeat)** | **Pathological Findings  (Initial/Repeat)** | **Immunofluorescence (Initial/Repeat)** | | | | | **FPE (Initial/Repeat)** |
| --- | --- | --- | --- | --- | --- | --- | --- | --- |
| **C3** | **C4** | **C1q** | **IgG** | **IgM** |
| 1 | MN/MN | SS 0%/0%, GS 5%/22% | -/- | -/- | -/- | 4+/3+ | 1+/- | 3+/1+ |
| 2 | MN/MN | SS 0%/0%, GS 4%/12% | 2+/- | -/- | -/- | 4+/3+ | -/- | 3+/1+ |
| 3 | MN/MN with lesions of FSGS | SS 0%/0%, GS 0%/0% | 3+/- | -/- | -/- | 4+/4+ | 3+/- | 3+/1+ |
| 4 | MN/ treated MN | SS 0%/0%, GS 25%/7% | -/- | -/- | -/- | 4+/- | -/- | 1+/1+ |
| 5 | MN/MN | SS 0%/0%, GS 0%/0% | 2+/- | -/- | -/- | 4+/3+ | -/1+ | 3+/1+ |
| 6 | MN/MN | SS 5%/7%, GS 10%/7% | 2+/- | -/- | 3+/- | 4+/4+ | -/2+ | 3+/1+ |
| 7 | MN/MN | SS 0%/0%, GS 0%/0% | 2+/2+ | -/- | -/- | 4+/- | -/- | 3+/1+ |
| 8 | Membranous LN V/ Membranous LN V | SS 4%/27%, GS 0%/0% | 2+/1+ | -/- | 2+/2+ | 4+/4+ | 2+/2+ | 1+/1+ |
| 9 | Diffuse proliferative LN IV/Membranous LN V | SS 2%/7%, GS 4%/7% | 4+/1+ | 1+/- | 4+/3+ | 3+/4+ | 2+/1+ | 1+/1+ |
| 10 | MN/MN | SS 50%/18%, GS 38%/18% | 2+/- | -/- | -/- | 4+/3+ | -/- | 3+/2+ |
| 11 | MN, PLA2R type/MN (negative PLA2R) | SS 0%/0%, GS 14%/5% | 2+/- | -/- | -/- | 4+/3+ | -/- | 3+/1+ |

Abbreviations: eGFR, estimated glomerular filtration rate; MPD, methylprednisolone; GS, global sclerosis; SS, segmental sclerosis; FPE, foot process effacement
